# Supplementary material for: Atom vacancies and electronic transmission Stark effects in boron nanoflake junctions
Source: Royal Society of Chemistry journal article supplement (doi:10.1039/d0tc03116j), 2020-01-01
Supplement: d0tc03116j1.pdf [file d0tc03116j1.pdf]

## **Supporting Information**

# **Atom Vacancies and Electronic Transmission Stark Effects in Boron Nanoflake Junctions**

Leighton O. Jones, Martín A. Mosquera, George C. Schatz\*, Tobin J. Marks\*, Mark A. Ratner

## Contents

|                                                                            |    |
|----------------------------------------------------------------------------|----|
| Ionization energies, electron affinities and reorganization energies ..... | 3  |
| ETSE Shift .....                                                           | 4  |
| Dipoles .....                                                              | 5  |
| Polarizability and Relative Dielectric Constant .....                      | 9  |
| Electrode Couplings .....                                                  | 12 |
| Cartesian Coordinates .....                                                | 13 |

Ionization energies, electron affinities and reorganization energies

**TABLE S1.** The energy processes involved for each step per BNF, from the isolated neutral ground states to their charge transfer state ( $N \rightarrow CT$ ), involving vertical ionization energy ( $I_{Ev}$ ), vertical electron affinity ( $EA_v$ ), and the hole ( $\lambda_h$ ) and electron reorganization energies ( $\lambda_e$ ), in eV.

| BNF             | $N \rightarrow CT$ | $I_{Ev}$ | $EA_v$ | $\lambda_h$ | $\lambda_e$ |
|-----------------|--------------------|----------|--------|-------------|-------------|
| B <sub>37</sub> | D $\rightarrow$ S  | 6.26     | 2.90   | 0.33        | 0.41        |
|                 | D $\rightarrow$ T  | 6.67     | 2.35   | 0.18        | 0.83        |
| B <sub>36</sub> | S $\rightarrow$ D  | 6.73     | 2.45   | 0.16        | 0.23        |
|                 | T $\rightarrow$ D  | 5.89     | 3.13   | 0.24        | 0.39        |
| B <sub>35</sub> | D $\rightarrow$ S  | 6.64     | 3.29   | 0.15        | 0.16        |
|                 | D $\rightarrow$ T  | 7.69     | 2.77   | 0.56        | 0.17        |

## ETSE Shift

**Table S2.** Electronic transmission Stark effect (ETSE) shifts ( $\vartheta$  /eV) of the resonance at the Fermi energy for each of the three BNFs with respect to the bias voltage. These ETSE shifts are referenced to the resonance at zero bias.

| Bias (V) | $\vartheta$ (B <sub>37</sub> ) | $\vartheta$ (B <sub>36</sub> ) | $\vartheta$ (B <sub>35</sub> ) |
|----------|--------------------------------|--------------------------------|--------------------------------|
| 0        | 0                              | 0                              | 0                              |
| 0.2      | -0.052                         | 0.046                          | -0.052                         |
| 0.4      | -0.136                         | 0.063                          | -0.141                         |
| 0.6      | -0.221                         | -0.017                         | -0.198                         |
| 0.8      | -0.292                         | -0.011                         | -0.088                         |
| 1.0      | -0.273                         | -0.083                         | -0.057                         |
| -0.2     | -0.061                         | 0.041                          | 0.069                          |
| -0.4     | -0.147                         | 0.051                          | 0.146                          |
| -0.6     | -0.235                         | -0.032                         | 0.205                          |
| -0.8     | -0.313                         | -0.109                         | 0.219                          |
| -1.0     | -0.310                         | -0.174                         | 0.210                          |

## Dipoles

The electric field numerical values were chosen to be equivalent to the bias voltage in steps of  $\pm 0.2$  eV between a  $\pm 1$  eV span. The  $B_{35}$ ,  $B_{36}$  and  $B_{37}$  were computed without the sulfur contacts and gold electrodes, in a large box using the Siesta program.

**Table S3.  $B_{37}$  dipole, in atomic units.**

| E-field   | dipole x | dipole y | dipole z | net dipole |
|-----------|----------|----------|----------|------------|
| -0.989999 | -0.14    | 0.43     | -16.35   | -0.14      |
| -0.791999 | -0.18    | 0.50     | -13.34   | -0.18      |
| -0.593999 | -0.23    | 0.57     | -10.33   | -0.23      |
| -0.396    | -0.28    | 0.64     | -7.31    | -0.28      |
| -0.198    | -0.34    | 0.72     | -4.04    | -0.34      |
| 0         | -0.43    | 0.82     | -0.21    | -0.43      |
| 0.198     | -0.51    | 0.91     | 3.58     | -0.51      |
| 0.396     | -0.59    | 1.01     | 7.40     | -0.59      |
| 0.593999  | -0.65    | 1.10     | 10.49    | -0.65      |
| 0.791999  | -0.71    | 1.19     | 13.50    | -0.71      |
| 0.989999  | -0.77    | 1.28     | 16.51    | -0.77      |

**Table S4.  $B_{36}$  dipoles, in atomic units.**

| E-field   | dipole x | dipole y | dipole z | net dipole |
|-----------|----------|----------|----------|------------|
| -0.989999 | -0.22    | 0.58     | -15.44   | -0.22      |
| -0.791999 | -0.27    | 0.64     | -12.31   | -0.27      |
| -0.593999 | -0.33    | 0.72     | -9.21    | -0.33      |
| -0.396    | -0.39    | 0.79     | -6.13    | -0.39      |
| -0.198    | -0.44    | 0.87     | -3.06    | -0.44      |
| 0         | -0.50    | 0.95     | 0.00     | -0.50      |
| 0.198     | -0.56    | 1.03     | 3.06     | -0.56      |
| 0.396     | -0.63    | 1.12     | 6.12     | -0.63      |
| 0.593999  | -0.69    | 1.21     | 9.20     | -0.69      |
| 0.791999  | -0.76    | 1.30     | 12.31    | -0.76      |
| 0.989999  | -0.83    | 1.40     | 15.44    | -0.83      |

Table S5. B<sub>35</sub> dipoles, in atomic units.

| E-field   | dipole x | dipole y | dipole z | net dipole |
|-----------|----------|----------|----------|------------|
| -0.989999 | -2.13    | 0.82     | 14.63    | -2.13      |
| -0.791999 | -2.07    | 0.74     | 11.61    | -2.07      |
| -0.593999 | -2.01    | 0.66     | 8.60     | -2.01      |
| -0.396    | -1.96    | 0.57     | 5.61     | -1.96      |
| -0.198    | -1.90    | 0.50     | 2.62     | -1.90      |
| 0         | -1.83    | 0.42     | -0.37    | -1.83      |
| 0.198     | -1.77    | 0.35     | -3.35    | -1.77      |
| 0.396     | -1.70    | 0.29     | -6.34    | -1.70      |
| 0.593999  | -1.63    | 0.23     | -9.32    | -1.63      |
| 0.791999  | -1.56    | 0.17     | -12.31   | -1.56      |
| 0.989999  | -1.49    | 0.11     | -15.30   | -1.49      |

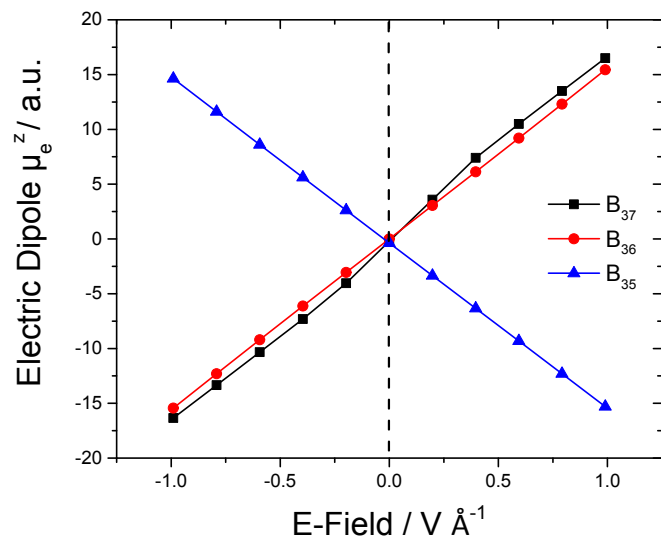

Figure S1. Electric Dipole, z-axis (a.u.) for B<sub>37</sub>, B<sub>36</sub> and B<sub>35</sub> across the electric field (V/Å) window.

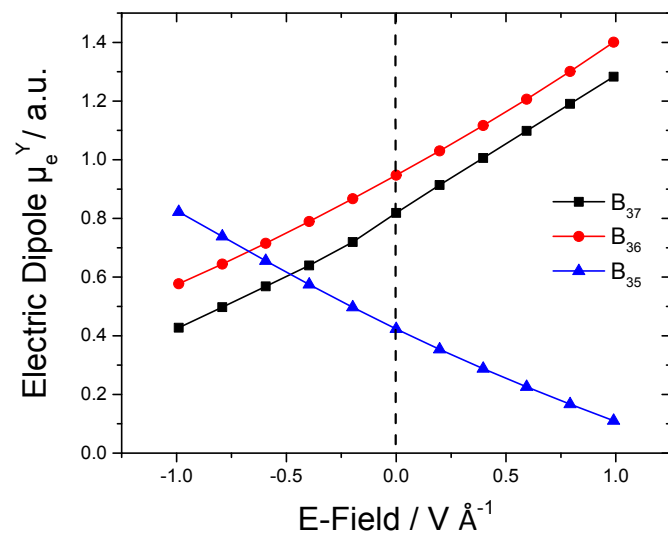

Figure S2. Electric Dipole, y-axis (a.u.) for  $B_{37}$ ,  $B_{36}$  and  $B_{35}$  across the electric field ( $V/\text{\AA}$ ) window.

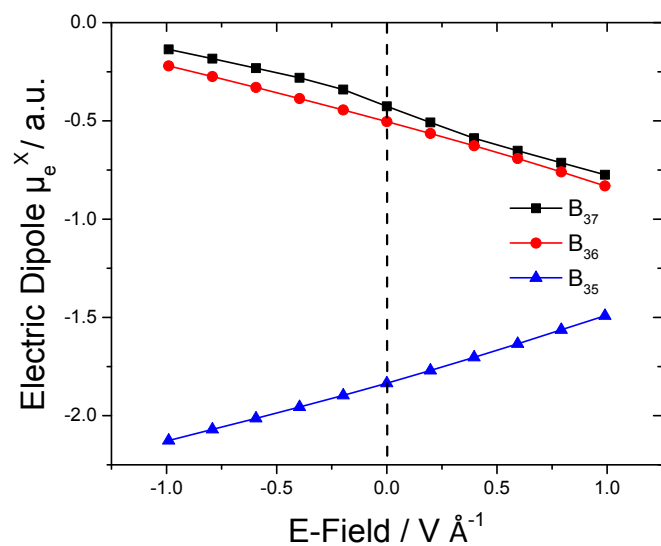

Figure S3. Electric Dipole, x-axis (a.u.) for  $B_{37}$ ,  $B_{36}$  and  $B_{35}$  across the electric field ( $V/\text{\AA}$ ) window.

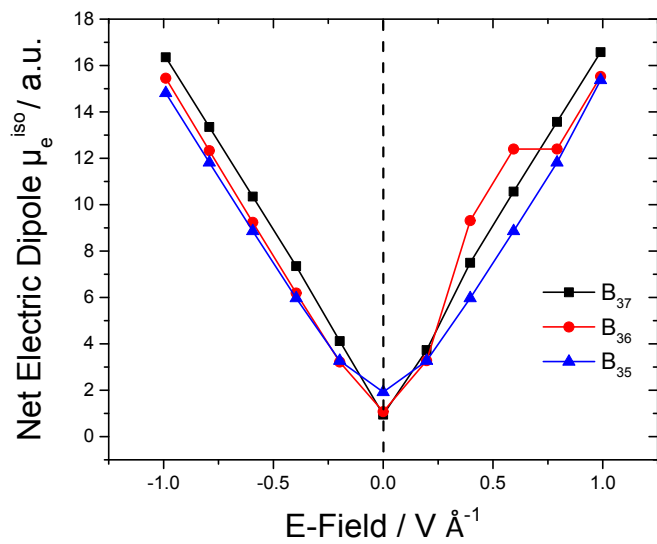

Figure S4. Net Electric Dipole (a.u.) for  $B_{37}$ ,  $B_{36}$  and  $B_{35}$  across the electric field ( $V/\text{\AA}$ ) window.



## Polarizability and Relative Dielectric Constant

The volumes used were those of the structures, not the volume of the box. The polarizability were computed as the division between the net dipole and E-field. All parameters are in atomic units. The relative dielectric constant were computed for completeness (using the method in reference 54), as a molecular relationship (in radians) between the Bohr volume and the net dipole.

B<sub>37</sub>

Volume = 345.14 Å<sup>3</sup>, 652.23 Bohr<sup>3</sup>.

Table S6.

| E-field   | $\alpha_{\text{iso}}$ | $\epsilon_{\text{rel}}$ |
|-----------|-----------------------|-------------------------|
| -0.989999 | -16.52                | 1.46                    |
| -0.791999 | -16.86                | 1.35                    |
| -0.593999 | -17.42                | 1.25                    |
| -0.396    | -18.56                | 1.16                    |
| -0.198    | -20.81                | 1.09                    |
| 0         | 0                     | 1.02                    |
| 0.198     | 18.85                 | 1.08                    |
| 0.396     | 18.93                 | 1.17                    |
| 0.593999  | 17.79                 | 1.26                    |
| 0.791999  | 17.13                 | 1.35                    |
| 0.989999  | 16.74                 | 1.47                    |

B<sub>36</sub>

Volume = 345.37 Å<sup>3</sup>, 652.65 Bohr<sup>3</sup>.

Table S7.

| E-field   | $\alpha_{\text{iso}}$ | $\epsilon_{\text{rel}}$ |
|-----------|-----------------------|-------------------------|
| -0.989999 | -15.61                | 1.42                    |
| -0.791999 | -15.57                | 1.31                    |
| -0.593999 | -15.55                | 1.22                    |
| -0.396    | -15.63                | 1.14                    |
| -0.198    | -16.22                | 1.07                    |
| 0         | 0.00                  | 1.02                    |
| 0.198     | 16.54                 | 1.07                    |
| 0.396     | 23.51                 | 1.22                    |
| 0.593999  | 20.88                 | 1.31                    |
| 0.791999  | 15.66                 | 1.31                    |
| 0.989999  | 15.68                 | 1.43                    |

B<sub>35</sub>

Volume = 342.79 Å<sup>3</sup>, 647.78 Bohr<sup>3</sup>.

Table S8.

| E-field   | $\alpha_{iso}$ | $\epsilon_{rel}$ |
|-----------|----------------|------------------|
| -0.989999 | -14.96         | 1.40             |
| -0.791999 | -14.92         | 1.30             |
| -0.593999 | -14.92         | 1.21             |
| -0.396    | -15.07         | 1.13             |
| -0.198    | -16.52         | 1.07             |
| 0         | 0.00           | 1.04             |
| 0.198     | 16.52          | 1.07             |
| 0.396     | 15.07          | 1.13             |
| 0.593999  | 14.92          | 1.21             |
| 0.791999  | 14.92          | 1.30             |
| 0.989999  | 15.53          | 1.43             |

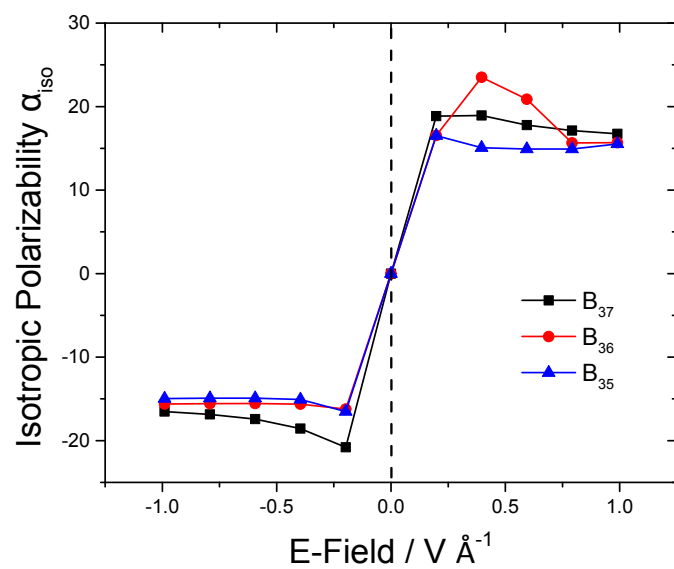

Figure S5. Isotropic polarizability for B<sub>37</sub>, B<sub>36</sub> and B<sub>35</sub> across the electric field (V/Å) window.

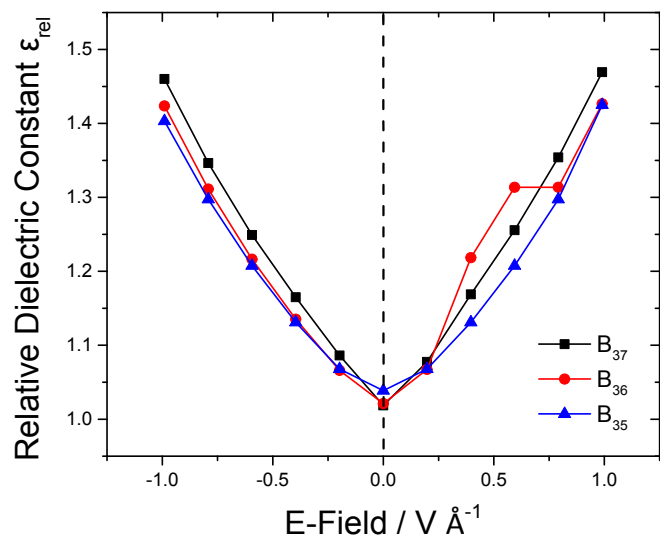

Figure S6. Relative Dielectric Constant for  $B_{37}$ ,  $B_{36}$  and  $B_{35}$  across the electric field ( $V/\text{\AA}$ ) window.

## Electrode Couplings

The coupling was deduced from FWHM analysis.

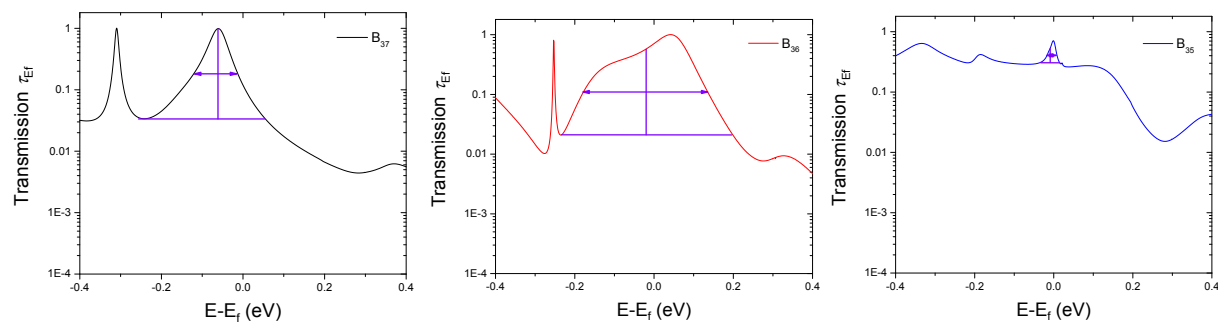

**Figure S7. Electrode coupling (eV) from FWHM analysis of the zero-bias resonance at the Fermi energy.**

# Cartesian Coordinates

Table S9. The Cartesian coordinates of the neutral, ground state isolated molecules.

| <b>B<sub>37</sub> (doublet)</b> |               |               | <b>B<sub>36</sub> (singlet)</b> |   |               | <b>B<sub>35</sub> (doublet)</b> |               |   |               |               |               |
|---------------------------------|---------------|---------------|---------------------------------|---|---------------|---------------------------------|---------------|---|---------------|---------------|---------------|
| B                               | 0.2066981600  | -0.1178346500 | -4.8080115000                   | B | 0.4380555600  | -0.4957833300                   | -5.0703861100 | B | 0.5983728200  | -0.6386756400 | -4.6987572300 |
| B                               | -1.0625104700 | -0.8349147200 | -4.1592077000                   | B | -0.8712444400 | -1.1083833300                   | -4.1811861100 | B | -0.7973325000 | -1.0917949800 | -4.0883604200 |
| B                               | 1.4380816600  | 0.5984170600  | -4.0913597500                   | B | 1.5809555600  | 0.2754166700                    | -4.0043061100 | B | 1.7110316500  | 0.2450052700  | -4.0487932100 |
| B                               | -2.4603084400 | -1.2999769200 | -3.3907703700                   | B | 0.0103555600  | 0.1689166700                    | -3.4627861100 | B | -2.1148647800 | -1.7378089500 | -3.3276010500 |
| B                               | 2.5271117300  | 1.5299323100  | -3.2498290300                   | B | -2.1563444400 | -1.8210833300                   | -3.4064861100 | B | 0.1438492400  | 0.1085386800  | -3.2827679000 |
| B                               | 0.0518449500  | 0.0709681300  | -3.1724465800                   | B | 2.8116555600  | 1.0299166700                    | -3.2653861100 | B | -2.8557219600 | 1.0359273900  | -3.1337107500 |
| B                               | -3.7569005400 | -1.7079760500 | -2.5530359300                   | B | -1.2055444400 | -0.5728833300                   | -2.5867861100 | B | -1.2539176000 | -0.3867768300 | -2.5319294000 |
| B                               | -0.9278084400 | -1.2188258800 | -2.5067456200                   | B | 1.2128555600  | 0.8488166700                    | -2.5186861100 | B | -3.1913194000 | -2.5082265100 | -2.4622651700 |
| B                               | 1.6009912600  | 0.2632372600  | -2.4050148900                   | B | -3.2254444400 | -2.6104833300                   | -2.4860861100 | B | 1.2614815500  | 1.0060227300  | -2.3877507300 |
| B                               | 3.4590634100  | 2.4325095400  | -2.3454376100                   | B | 3.9985555600  | 1.4949166700                    | -2.2792861100 | B | 4.0585289400  | 1.5433644200  | -2.2132570700 |
| B                               | -2.4061905700 | -1.3852627800 | -1.6878299400                   | B | -2.5300444400 | -1.2738833300                   | -1.7621861100 | B | -2.4536800500 | -1.2209400500 | -1.7195508500 |
| B                               | 2.6892452800  | 1.2010381600  | -1.5602494200                   | B | -0.3175444400 | 0.6514166700                    | -1.7527861100 | B | -0.2242373100 | 0.6752197000  | -1.6875832900 |
| B                               | 0.1031166100  | 0.0049786300  | -1.5208084400                   | B | -2.4625555600 | 1.5933166700                    | -1.6213861100 | B | 2.5120070000  | 1.6430585400  | -1.5595489400 |
| B                               | -3.8976652100 | -1.7759391400 | -0.9686643200                   | B | -3.5267444400 | -2.4109833300                   | -0.9331861100 | B | -3.5005004300 | -2.3412180000 | -0.9287999800 |
| B                               | -0.8942156900 | -1.3564702600 | -0.8335051400                   | B | -1.4846444400 | -0.1695833300                   | -0.9184861100 | B | -1.5155244600 | -0.0474595000 | -0.8930433700 |
| B                               | 1.7270995300  | 0.0219817900  | -0.7544532700                   | B | 0.9407555600  | 1.2489166700                    | -0.8474861100 | B | 0.9780281500  | 1.4448631500  | -0.8125620600 |
| B                               | 3.5575903600  | 2.4442545300  | -0.7508153300                   | B | 3.9205555600  | 1.8082166700                    | -0.7178611000 | B | 4.0061063300  | 1.8722446800  | -0.7006136700 |
| B                               | -2.4426818600 | -1.6229425900 | -0.0614339900                   | B | -2.6283444400 | -1.1092833300                   | -0.0915861100 | B | -2.6667879500 | -0.9743370300 | -0.0923331600 |
| B                               | -0.4063196800 | 0.2259620900  | -0.0240595700                   | B | 2.3079555600  | 1.7012166700                    | 0.0551138900  | B | -3.5721455800 | -2.3041652200 | 0.7282460100  |
| B                               | 2.5382309200  | 1.3383732000  | 0.0737325100                    | B | -3.6221444400 | -2.3563833300                   | 0.74004138900 | B | -1.5866169000 | -0.0108357200 | 0.7615129800  |
| B                               | -3.9722731600 | -1.7279111400 | 0.7213902500                    | B | -1.5530444400 | -0.1368333000                   | 0.7916138900  | B | 0.9071462000  | 1.4814566200  | 0.8299918100  |
| B                               | -0.9673700400 | -1.3180512500 | 0.8758193000                    | B | 0.8760555600  | 1.2596166700                    | 0.8553138900  | B | 3.9352465000  | 1.9060062400  | 0.9569758900  |
| B                               | 1.6544106600  | 0.0695159000  | 0.9015661900                    | B | 3.8478555600  | 1.8378166700                    | 0.9544138900  | B | -2.5906138000 | -1.1478959900 | 1.5555506700  |
| B                               | 3.4832878500  | 2.4924829700  | 0.9202958100                    | B | -2.6915444400 | -1.1747833300                   | 1.5905138900  | B | -0.3673530700 | 0.7409670500  | 1.6316290400  |
| B                               | -0.0306708100 | 0.0907787600  | 1.5216397200                    | B | -0.4448444400 | 0.7020166700                    | 1.6742138900  | B | -3.3728689600 | 1.7130775000  | 1.6949734400  |
| B                               | -2.5486547800 | -1.2931340100 | 1.5455982700                    | B | 2.3266555600  | 1.6442166700                    | 1.7402138900  | B | -3.3965270200 | -2.4023200400 | 2.2889361800  |
| B                               | 2.5441358300  | 1.2955018900  | 1.7199998200                    | B | -3.5084444400 | -2.4224833300                   | 2.3351138900  | B | -1.4672080700 | -0.2762851500 | 2.4296504100  |
| B                               | -3.9711813100 | -1.5694935000 | 2.3055188700                    | B | -1.4722444400 | -0.3958833300                   | 2.5133138900  | B | 1.0546057000  | 1.1121623900  | 2.4410059500  |
| B                               | -1.1477080900 | -1.0765065200 | 2.4807738200                    | B | 3.8003555600  | 1.5961166700                    | 2.5303138900  | B | -2.3968325000 | -1.5925321400 | 3.2080398500  |
| B                               | 3.2448774200  | 2.5724477200  | 2.4979686800                    | B | 0.9907555600  | 0.9653166700                    | 2.5700138900  | B | -0.1381849000 | 0.2529825300  | 3.2758350400  |
| B                               | 1.3836805800  | 0.4045930000  | 2.5180195900                    | B | -2.5166444400 | -1.5887833300                   | 3.3035138900  | B | 2.5000606600  | 1.1731278300  | 3.3168316600  |
| B                               | -0.2274003600 | 0.2518729100  | 3.1552058000                    | B | 2.5374555600  | 1.1595166700                    | 3.4360138900  | B | -1.1474928600 | -0.9122897900 | 4.0495689800  |
| B                               | -2.7524293400 | -1.1111263100 | 3.2295119100                    | B | -0.2815444400 | 0.3242166700                    | 3.4395138900  | B | 1.3590254000  | 0.4229133500  | 4.1645658900  |
| B                               | 2.2342319900  | 1.7206391300  | 3.3669237600                    | B | -1.2922444400 | -0.8431833300                   | 4.1529138900  | B | 0.1925922700  | -0.4318583400 | 4.7558675300  |
| B                               | -1.4268168600 | -0.5984943400 | 4.0901473900                    | B | 1.2285555600  | 0.4825166700                    | 4.1869138900  |   |               |               |               |
| B                               | 1.0729458200  | 0.8360539900  | 4.1611097500                    | B | 0.0207555600  | -0.2998833300                   | 5.1162138900  |   |               |               |               |
| B                               | -0.2183328900 | 0.1583210900  | 4.8063943400                    |   |               |                                 |               |   |               |               |               |



|    |           |           |           |    |           |          |           |    |           |          |           |
|----|-----------|-----------|-----------|----|-----------|----------|-----------|----|-----------|----------|-----------|
| Au | 1.424298  | 4.164133  | 34.736180 | Au | 8.54987   | 6.626212 | 34.736180 | Au | 7.212489  | 4.164133 | 34.736480 |
| Au | 4.327494  | 4.164133  | 34.736180 | Au | 2.884996  | 6.626212 | 34.736180 | Au | 18.097488 | 4.164133 | 34.736480 |
| Au | 7.212489  | 4.164133  | 34.736180 | Au | 2.884996  | 6.626212 | 34.736180 | Au | 2.884996  | 6.626212 | 34.736480 |
| Au | 10.097485 | 4.164133  | 34.736180 | Au | 10.097485 | 4.164133 | 34.736180 | Au | 5.769991  | 6.626212 | 34.736480 |
| Au | 2.884996  | 6.626212  | 34.736180 | Au | 4.327494  | 4.164133 | 34.736180 | Au | 8.54987   | 6.626212 | 34.736480 |
| Au | 5.769991  | 6.626212  | 34.736180 | Au | 4.327494  | 4.164133 | 34.736180 | Au | 11.539983 | 6.626212 | 34.736480 |
| Au | 8.54987   | 6.626212  | 34.736180 | Au | 1.424298  | 4.164133 | 34.736180 | Au | 5.769991  | 6.626212 | 34.736480 |
| Au | 12.982488 | 9.161092  | 34.736180 | Au | 8.54987   | 6.626212 | 34.736180 | Au | 7.212489  | 9.161092 | 34.736480 |
| Au | 10.097485 | 9.161092  | 34.736180 | Au | 5.769991  | 6.626212 | 34.736180 | Au | 18.097488 | 9.161092 | 34.736480 |
| Au | 12.982488 | 9.161092  | 34.736180 | Au | 12.982488 | 9.161092 | 34.736180 | Au | 12.982488 | 9.161092 | 34.736480 |
| Au | 0.000000  | 0.000000  | 37.069700 | Au | 10.097485 | 7.495439 | 37.069700 | Au | 0.000000  | 0.000000 | 37.070300 |
| Au | 2.884996  | 0.000000  | 37.069700 | Au | 7.212489  | 7.495439 | 37.069700 | Au | 8.54987   | 0.000000 | 37.070300 |
| Au | 5.769991  | 0.000000  | 37.069700 | Au | 4.327494  | 7.495439 | 37.069700 | Au | 5.769991  | 0.000000 | 37.070300 |
| Au | 8.54987   | 0.000000  | 37.069700 | Au | 11.539983 | 4.996959 | 37.069700 | Au | 8.54987   | 0.000000 | 37.070300 |
| Au | 1.424298  | 2.498480  | 37.069700 | Au | 10.097485 | 2.498480 | 37.069700 | Au | 7.212489  | 4.996959 | 37.070300 |
| Au | 4.327494  | 2.498480  | 37.069700 | Au | 5.769991  | 4.996959 | 37.069700 | Au | 10.097485 | 2.498480 | 37.070300 |
| Au | 7.212489  | 2.498480  | 37.069700 | Au | 2.884996  | 4.996959 | 37.069700 | Au | 2.884996  | 4.996959 | 37.070300 |
| Au | 10.097485 | 2.498480  | 37.069700 | Au | 10.097485 | 2.498480 | 37.069700 | Au | 5.769991  | 4.996959 | 37.070300 |
| Au | 2.884996  | 4.996959  | 37.069700 | Au | 7.212489  | 2.498480 | 37.069700 | Au | 8.54987   | 4.996959 | 37.070300 |
| Au | 5.769991  | 4.996959  | 37.069700 | Au | 4.327494  | 2.498480 | 37.069700 | Au | 11.539983 | 4.996959 | 37.070300 |
| Au | 8.54987   | 4.996959  | 37.069700 | Au | 1.424298  | 2.498480 | 37.069700 | Au | 4.327494  | 7.495439 | 37.070300 |
| Au | 11.539983 | 4.996959  | 37.069700 | Au | 8.54987   | 0.000000 | 37.069700 | Au | 7.212489  | 7.495439 | 37.070300 |
| Au | 4.327494  | 7.495439  | 37.069700 | Au | 5.769991  | 0.000000 | 37.069700 | Au | 10.097485 | 7.495439 | 37.070300 |
| Au | 7.212489  | 7.495439  | 37.069700 | Au | 12.982488 | 0.000000 | 37.069700 | Au | 12.982488 | 7.495439 | 37.070300 |
| Au | 10.097485 | 7.495439  | 37.069700 | Au | 0.000000  | 0.000000 | 37.069700 | Au | 1.424298  | 0.832830 | 39.425300 |
| Au | 12.982488 | 7.495439  | 37.069700 | Au | 1.424298  | 0.832830 | 39.425300 | Au | 4.327494  | 0.832830 | 39.425300 |
| Au | 0.000000  | 0.832830  | 39.425300 | Au | 4.327494  | 0.832830 | 39.425300 | Au | 10.097488 | 0.832830 | 39.425300 |
| Au | 1.424298  | 0.832830  | 39.425300 | Au | 10.097488 | 0.832830 | 39.425300 | Au | 2.885000  | 2.331310 | 39.425300 |
| Au | 4.327494  | 0.832830  | 39.425300 | Au | 2.885000  | 2.331310 | 39.425300 | Au | 5.769991  | 3.313130 | 39.425300 |
| Au | 10.097488 | 0.832830  | 39.425300 | Au | 5.769991  | 3.313130 | 39.425300 | Au | 8.549996  | 3.313130 | 39.425300 |
| Au | 2.885000  | 2.331310  | 39.425300 | Au | 8.549996  | 3.313130 | 39.425300 | Au | 11.539983 | 3.313130 | 39.425300 |
| Au | 5.769991  | 3.313130  | 39.425300 | Au | 11.539983 | 3.313130 | 39.425300 | Au | 4.327494  | 5.829790 | 39.425300 |
| Au | 8.549996  | 3.313130  | 39.425300 | Au | 4.327494  | 5.829790 | 39.425300 | Au | 7.212489  | 5.829790 | 39.425300 |
| Au | 11.539983 | 3.313130  | 39.425300 | Au | 7.212489  | 5.829790 | 39.425300 | Au | 10.097488 | 5.829790 | 39.425300 |
| Au | 4.327494  | 5.829790  | 39.425300 | Au | 10.097488 | 5.829790 | 39.425300 | Au | 12.982488 | 5.829790 | 39.425300 |
| Au | 7.212489  | 5.829790  | 39.425300 | Au | 12.982488 | 5.829790 | 39.425300 | Au | 0.000000  | 8.328270 | 39.425300 |
| Au | 10.097488 | 5.829790  | 39.425300 | Au | 0.000000  | 8.328270 | 39.425300 | Au | 8.549996  | 8.328270 | 39.425300 |
| Au | 12.982488 | 5.829790  | 39.425300 | Au | 8.549996  | 8.328270 | 39.425300 | Au | 11.539983 | 8.328270 | 39.425300 |
| Au | 0.000000  | 8.328270  | 39.425300 | Au | 11.539983 | 8.328270 | 39.425300 | Au | 14.424988 | 8.328270 | 39.425300 |
| Au | 8.549996  | 8.328270  | 39.425300 | Au | 14.424988 | 8.328270 | 39.425300 | Au | 2.885000  | 1.665650 | 41.780900 |
| Au | 11.539983 | 8.328270  | 39.425300 | Au | 2.885000  | 1.665650 | 41.780900 | Au | 5.769991  | 1.665650 | 41.780900 |
| Au | 14.424988 | 8.328270  | 39.425300 | Au | 5.769991  | 1.665650 | 41.780900 | Au | 8.549996  | 1.665650 | 41.780900 |
| Au | 0.000000  | 1.665650  | 41.780900 | Au | 8.549996  | 1.665650 | 41.780900 | Au | 1.424298  | 4.164130 | 41.780900 |
| Au | 1.665650  | 4.164130  | 41.780900 | Au | 1.424298  | 4.164130 | 41.780900 | Au | 4.327494  | 4.164130 | 41.780900 |
| Au | 4.164130  | 4.164130  | 41.780900 | Au | 4.327494  | 4.164130 | 41.780900 | Au | 7.212489  | 4.164130 | 41.780900 |
| Au | 8.328270  | 4.164130  | 41.780900 | Au | 7.212489  | 4.164130 | 41.780900 | Au | 10.097488 | 4.164130 | 41.780900 |
| Au | 11.539983 | 4.164130  | 41.780900 | Au | 10.097488 | 4.164130 | 41.780900 | Au | 12.982488 | 4.164130 | 41.780900 |
| Au | 14.424988 | 4.164130  | 41.780900 | Au | 12.982488 | 4.164130 | 41.780900 | Au | 0.000000  | 6.626210 | 41.780900 |
| Au | 0.000000  | 6.626210  | 41.780900 | Au | 0.000000  | 6.626210 | 41.780900 | Au | 5.769991  | 6.626210 | 41.780900 |
| Au | 6.626210  | 9.161090  | 41.780900 | Au | 5.769991  | 6.626210 | 41.780900 | Au | 8.549996  | 6.626210 | 41.780900 |
| Au | 1.665650  | 9.161090  | 41.780900 | Au | 8.549996  | 6.626210 | 41.780900 | Au | 11.539983 | 6.626210 | 41.780900 |
| Au | 4.164130  | 9.161090  | 41.780900 | Au | 11.539983 | 6.626210 | 41.780900 | Au | 14.424988 | 6.626210 | 41.780900 |
| Au | 8.328270  | 9.161090  | 41.780900 | Au | 14.424988 | 6.626210 | 41.780900 | Au | 2.885000  | 9.161090 | 41.780900 |
| Au | 11.539983 | 9.161090  | 41.780900 | Au | 2.885000  | 9.161090 | 41.780900 | Au | 5.769991  | 9.161090 | 41.780900 |
| Au | 14.424988 | 9.161090  | 41.780900 | Au | 5.769991  | 9.161090 | 41.780900 | Au | 8.549996  | 9.161090 | 41.780900 |
| Au | 0.000000  | 9.161090  | 41.780900 | Au | 8.549996  | 9.161090 | 41.780900 | Au | 11.539983 | 9.161090 | 41.780900 |
| Au | 9.161090  | 11.539980 | 41.780900 | Au | 11.539983 | 9.161090 | 41.780900 | Au | 14.424988 | 9.161090 | 41.780900 |
| Au | 1.665650  | 11.539980 | 41.780900 | Au | 14.424988 | 9.161090 | 41.780900 | Au | 0.000000  | 1.136500 | 44.136500 |
| Au | 4.164130  | 11.539980 | 41.780900 | Au | 0.000000  | 1.136500 | 44.136500 | Au | 5.769991  | 0.000000 | 44.136500 |
| Au | 8.328270  | 11.539980 | 41.780900 | Au | 5.769991  | 0.000000 | 44.136500 | Au | 8.549996  | 0.000000 | 44.136500 |
| Au | 11.539983 | 11.539980 | 41.780900 | Au | 8.549996  | 0.000000 | 44.136500 | Au | 11.539983 | 0.000000 | 44.136500 |
| Au | 14.424988 | 11.539980 | 41.780900 | Au | 11.539983 | 0.000000 | 44.136500 | Au | 14.424988 | 0.000000 | 44.136500 |
| Au | 0.000000  | 1.136500  | 44.136500 | Au | 14.424988 | 0.000000 | 44.136500 | Au | 2.885000  | 2.498480 | 44.136500 |
| Au | 1.136500  | 2.498480  | 44.136500 | Au | 2.885000  | 2.498480 | 44.136500 | Au | 5.769991  | 2.498480 | 44.136500 |
| Au | 2.498480  | 2.498480  | 44.136500 | Au | 5.769991  | 2.498480 | 44.136500 | Au | 8.549996  | 2.498480 | 44.136500 |
| Au | 5.769991  | 2.498480  | 44.136500 | Au | 8.549996  | 2.498480 | 44.136500 | Au | 11.539983 | 2.498480 | 44.136500 |
| Au | 8.549996  | 2.498480  | 44.136500 | Au | 11.539983 | 2.498480 | 44.136500 | Au | 14.424988 | 2.498480 | 44.136500 |
| Au | 11.539983 | 2.498480  | 44.136500 | Au | 14.424988 | 2.498480 | 44.136500 | Au | 0.000000  | 1.665650 | 48.847700 |
| Au | 14.424988 | 2.498480  | 44.136500 | Au | 0.000000  | 1.665650 | 48.847700 | Au | 2.885000  | 1.665650 | 48.847700 |
| Au | 0.000000  | 1.665650  | 48.847700 | Au | 2.885000  | 1.665650 | 48.847700 | Au | 5.769991  | 1.665650 | 48.847700 |
| Au | 1.665650  | 4.164130  | 48.847700 | Au | 5.769991  | 1.665650 | 48.847700 | Au | 8.549996  | 4.164130 | 48.847700 |
| Au | 4.164130  | 4.164130  | 48.847700 | Au | 8.549996  | 4.164130 | 48.847700 | Au | 11.539983 | 4.164130 | 48.847700 |
| Au | 8.328270  | 4.164130  | 48.847700 | Au | 11.539983 | 4.164130 | 48.847700 | Au | 14.424988 | 4.164130 | 48.847700 |
| Au | 11.539983 | 4.164130  | 48.847700 | Au | 14.424988 | 4.164130 | 48.847700 | Au | 0.000000  | 6.626210 | 48.847700 |
| Au | 14.424988 | 4.164130  | 48.847700 | Au | 0.000000  | 6.626210 | 48.847700 | Au | 5.769991  | 6.626210 | 48.847700 |
| Au | 0.000000  | 6.626210  | 48.847700 | Au | 5.769991  | 6.626210 | 48.847700 | Au | 8.549996  | 6.626210 | 48.847700 |
| Au | 6.626210  | 9.161090  | 48.847700 | Au | 8.549996  | 6.626210 | 48.847700 | Au | 11.539983 | 6.626210 | 48.847700 |
| Au | 9.161090  | 9.161090  | 48.847700 | Au | 11.539983 | 6.626210 | 48.847700 | Au | 14.424988 | 6.626210 | 48.847700 |
| Au | 11.539983 | 9.161090  | 48.847700 | Au | 14.424988 | 6.626210 | 48.847700 | Au | 0.000000  | 9.161090 | 48.847700 |
| Au | 14.424988 | 9.161090  | 48.847700 | Au | 0.000000  | 9.161090 | 48.847700 | Au | 5.769991  | 9.161090 | 48.847700 |
| Au | 0.000000  | 9.161090  | 48.847700 | Au | 5.769991  | 9.161090 | 48.847700 | Au | 8.549996  | 9.161090 | 48.847700 |
| Au | 9.161090  | 11.539980 | 48.847700 | Au | 8.549996  | 9.161090 | 48.847700 | Au | 11.539983 | 9.161090 | 48.847700 |
| Au | 1.665650  | 11.539980 | 48.847700 | Au | 11.539983 | 9.161090 | 48.847700 | Au | 14.424988 | 9.161090 | 48.847700 |
| Au | 4.164130  | 11.539980 | 48.847700 | Au | 14.424988 | 9.161090 | 48.847700 | Au | 0.000000  | 1.203300 | 51.203300 |
| Au | 8.328270  | 11.539980 | 48.847700 | Au | 0.000000  | 1.203300 | 51.203300 | Au | 2.885000  | 0.000000 | 51.203300 |
| Au | 11.539983 | 11.539980 | 48.847700 | Au | 2.885000  | 0.000000 | 51.203300 | Au | 5         |          |           |
